# Supplementary material for: The Auxin-Response Repressor IAA30 Is Down-Regulated in Reproductive Tissues of Apomictic Paspalum notatum
Source: MDPI journal article supplement (doi:10.3390/plants11111472), 2022-05-31
Supplement: s1 [file s1]

**Table S4.** Primers used for qRT-PCR and RT-PCR amplification reactions:

| Primer name       | 5'-3' sequence            | Fragment                                                                           | Length of amplification product/s (bp) |
|-------------------|---------------------------|------------------------------------------------------------------------------------|----------------------------------------|
| RTPnIAA30F        | TGGTGTGTCAACTGTCCTATCTG   | <i>PnIAA30</i> fragment used in qRT-PCR assays                                     | 109 <sup>1</sup>                       |
| RTPnIAA30R        | TTCATGGCTTCTCTCTTTCGTAG   |                                                                                    |                                        |
| RTPnIAA30IF       | ATGAAAGGATCAGAAGCCATTG    | <i>PnIAA30</i> fragment spanning between adjacent exons                            | 200 <sup>1</sup> , 418 <sup>2</sup>    |
| RTPnIAA30IR       | GTAGAGGCTTGGAGAACACAGG    |                                                                                    |                                        |
| IAA30_probeF      | CGACGCATGCATCTGAATTA      | <i>PnIAA30</i> fragment used as a probe in in situ hybridization experiments       | 503 <sup>1,2</sup>                     |
| IAA30_probeR      | TGCATGGAACAGTTAACACCA     |                                                                                    |                                        |
| $\beta$ -tubulinF | GTGGAGTGGATCCCCAACAA      | $\beta$ -tubulin fragment used in qRT-PCR assays as normalizer                     | 157 <sup>1,2</sup>                     |
| $\beta$ -tubulinR | AAAGCCTTCCTCCTGAACATGG    |                                                                                    |                                        |
| GPDHF             | CATCAGAGATGAGAAAGTCAAGGTT | GDPH fragment spanning between adjacent exons used in qRT-PCR assays as normalizer | 194 <sup>1</sup> , 520 <sup>2</sup>    |
| GPDHR             | AGCTTTAAGAATGAAAGGAACACCT |                                                                                    |                                        |

<sup>1</sup>using cDNA as template, <sup>2</sup>using genomic DNA as template
